# Supplementary material for: Targeted Analysis of HSP70 Isoforms in Human Spermatozoa in the Context of Capacitation and Motility
Source: MDPI journal article supplement (doi:10.3390/ijms23126497), 2022-06-10
Supplement: s1 [file s1]

# Targeted analysis of HSP70 isoforms in human spermatozoa in the context of capacitation and motility

Sarah Grassi<sup>1</sup>, Marie Bisconti<sup>1</sup>, Baptiste Martinet<sup>2</sup>, Vanessa Arcolia<sup>3</sup>, Jean-François Simon<sup>3</sup>, Ruddy Wattiez<sup>4</sup>, Baptiste Leroy<sup>4</sup>, Elise Hennebert<sup>1\*</sup>.

<sup>1</sup> Laboratory of Cell Biology, Research Institute for Biosciences, Research Institute for Health sciences and Technology, University of Mons, Place du Parc 23, 7000 Mons, Belgium

<sup>2</sup> Evolutionary Biology & Ecology, Université Libre de Bruxelles, Avenue Paul Héger - CP 160/12, 1000 Brussels, Belgium

<sup>3</sup> Clinique de Fertilité Régionale de Mons, CHU Ambroise Paré Hospital, Boulevard Kennedy 2, 7000 Mons, Belgium

<sup>4</sup> Laboratory of Proteomics and Microbiology, CISMa, Research Institute for Biosciences, University of Mons, Place du Parc 23, 7000 Mons, Belgium

## **\*Corresponding author:**

Elise Hennebert, Laboratory of Cell Biology, Research Institute for Biosciences, Research Institute for Health sciences and Technology, University of Mons, Place du Parc 23, 7000 Mons, Belgium

E-mail address: [elise.hennebert@umons.ac.be](mailto:elise.hennebert@umons.ac.be)

**Table S1.** Variation in HSP70 isoform abundance in asthenozoospermic samples in comparison to normozoospermic samples in different studies

|                              | HSPA1 | HSPA1L | HSPA2 | HSPA4 | HSPA4L | HSPA5 | HSPA6 | HSPA8 | HSPA9 |
|------------------------------|-------|--------|-------|-------|--------|-------|-------|-------|-------|
| Martinez-Heredia et al. 2008 |       |        | ↑     |       |        |       |       |       |       |
| Siva et al. 2010             |       |        | ↓     |       |        |       |       |       |       |
| Parte et al. 2012            | ↑     | ↑      | ↓     |       |        | ↓     | ↑     | ↑     |       |
| Amaral et al. 2014           | =     | =      | ↑     | =     | =      | =     |       | =     | =     |
| Hashemitabar et al. 2015     |       |        | ↓     |       |        |       |       |       | ↓     |
| Saraswat et al. 2017         | =     | ↓      | ↑     | ↓     | =      | =     | =     | ↑     | ↑     |
| Guo et al. 2019              | =     | =      | =     | =     | =      | =     | =     | =     | =     |
| Yang et al. 2022             |       |        |       |       | ↑      |       |       |       | ↓     |

↑ : up-regulation in asthenozoospermic samples, ↓ : down-regulation in asthenozoospermic samples, = : no variation, empty cells: isoform not detected or for which no information is available.

**Table S2.** Parameters of the semen samples included in the study, information from the donors, and the experiment(s) for which they were used

| Donor | Age (years) | Volume (ml) | Viscosity    | pH  | Sperm count (x 10 <sup>6</sup> sperm/ml) | Total motility (%) | Progressive motility (%) | Normal morphology (%) | Body mass index (BMI) (kg/m <sup>2</sup> ) | Experiment <sup>a</sup> | Group <sup>b</sup> |
|-------|-------------|-------------|--------------|-----|------------------------------------------|--------------------|--------------------------|-----------------------|--------------------------------------------|-------------------------|--------------------|
| 1     | 29          | 3.5         | normal       | 7.9 | 59.3                                     | 63.1               | 42.4                     | 3.3                   | 25.1                                       | i, iii                  | T                  |
| 2     | 20          | 6           | increased    | 8.7 | 52.8                                     | 73.2               | 49.3                     | 8.3                   | 19.9                                       | i, ii, iii              | N                  |
| 3     | 22          | 5.5         | normal       | 8.1 | 22.5                                     | 47                 | 31.3                     | 5.1                   | 18.4                                       | iii                     |                    |
| 4     | 31          | 2.2         | normal       | 8.1 | 34.4                                     | 47.5               | 34.4                     | 0.8                   | 23.9                                       | iii                     |                    |
| 5     | 27          | 5.5         | normal       | 8.1 | 46.8                                     | 45.1               | 22.7                     | 17.5                  | 33.3                                       | iii                     |                    |
| 6     | 21          | 5.2         | normal       | 7.8 | 25.3                                     | 57.5               | 40.4                     | 1.7                   | 19.4                                       | ii, iii                 | T                  |
| 7     | 30          | 4.6         | normal       | 7.9 | 92.7                                     | 52.6               | 28.1                     | 4.2                   | 38.3                                       | iii                     |                    |
| 8     | 29          | 1.5         | normal       | 8.1 | 66.6                                     | 89.5               | 71.6                     | 4                     | 22.4                                       | iii                     | N                  |
| 9     | 31          | 2.3         | normal       | 7.9 | 291.9                                    | 98.4               | 79.1                     | 5.8                   | 22.6                                       | ii, iii                 | N                  |
| 10    | 28          | 2           | increased    | 8.5 | 239                                      | 85                 | 54.1                     | 3.1                   | 25.9                                       | ii, iii                 | T                  |
| 11    | 41          | 10          | normal       | 7.9 | 87                                       | 37.9               | 20.9                     | 0.8                   | 24.3                                       | iii                     | A                  |
| 12    | 20          | 5.5         | increased    | 7.9 | 31.9                                     | 71.8               | 61.6                     | 10.1                  | 26.7                                       | ii, iii                 | N                  |
| 13    | 22          | 2.5         | increased    | 7.9 | 17.5                                     | 27.3               | 18.3                     | <1                    | 17.4                                       | iii                     | A                  |
| 14    | 32          | 4           | normal       | 7.8 | 120.3                                    | 73.8               | 49.3                     | 5                     | 23.1                                       | ii, iii                 | N                  |
| 15    | 54          | 6.1         | normal       | 8.1 | 28.5                                     | 47.7               | 37.8                     | 1.7                   | 33.2                                       | iii                     |                    |
| 16    | 42          | 4.7         | normal       | 8.4 | 21.5                                     | 46.3               | 32.9                     | 1.7                   | 26.3                                       | iii                     |                    |
| 17    | 23          | 7           | normal       | 8.1 | 21.2                                     | 36.9               | 24.3                     | 2.4                   | 20.8                                       | iii                     | A                  |
| 18    | 26          | 4           | hyperviscous | 7.9 | 95.3                                     | 71.5               | 41.6                     | 0.8                   | 22.8                                       | iii                     |                    |
| 19    | 43          | 9           | normal       | 8.1 | 47.8                                     | 61.4               | 44.3                     | 4.1                   | 29.4                                       | iii                     | N                  |
| 20    | 36          | 3.5         | normal       | 7.7 | 71.5                                     | 84.4               | 68.1                     | 5.3                   | 20.5                                       | iii                     | N                  |
| 21    | 30          | 2.8         | normal       | 8.1 | 38.5                                     | 79.3               | 63.2                     | 4                     | 29.1                                       | i                       |                    |
| 22    | 29          | 6           | normal       | 8.5 | 110.3                                    | 80.3               | 53.8                     | <1                    | 23.4                                       | i                       |                    |

Cells highlighted in red denote parameters whose values are outside the reference values provided by the World Health Organization (WHO) 2021 guidelines.

<sup>a</sup> i: immunofluorescence, ii: MRM for capacitation, iii: MRM for motility

<sup>b</sup> Groups used for the comparison of HSP70 isoform abundance in relation to sperm motility (following parameters defined in the Results section). A: asthenoteratozoospermic samples, N: normozoospermic samples, T: teratozoospermic samples.

**Table S3.** Transition list for the MRM analysis for the study on the abundance of HSP70 isoforms in relation to sperm capacitation → Excel file

**Table S4.** Transition list for the MRM analysis for the study on the abundance of HSP70 isoforms in relation to sperm motility → Excel file

**Table S5.** Sperm parameters for non-capacitated and capacitated spermatozoa from the 9 individuals used for the analysis of the influence of capacitation on HSP70 abundance and localization

| Donor | Progressive motility (%) |             | Total motility (%) |             | Vitality (%)    |             |
|-------|--------------------------|-------------|--------------------|-------------|-----------------|-------------|
|       | Non-capacitated          | Capacitated | Non-capacitated    | Capacitated | Non-capacitated | Capacitated |
| 1     | 74.04                    | 63.01       | 79.81              | 71.23       | 90.00           | 86.67       |
| 2     | ND                       | 57.89       | ND                 | 80.45       | 92.00           | 89.37       |
| 6     | 71.62                    | 61.70       | 77.03              | 72.34       | 93.67           | 92.00       |
| 9     | 71.88                    | 80.58       | 73.96              | 84.47       | 86.67           | 86.00       |
| 10    | 87.50                    | 57.81       | 89.29              | 65.63       | 89.77           | 91.33       |
| 12    | 80.00                    | 73.13       | 87.69              | 82.09       | 91.33           | 91.00       |
| 14    | 61.73                    | 61.11       | 72.84              | 68.06       | 89.40           | 89.67       |
| 21    | 78.91                    | 65.38       | 82.31              | 80.77       | 92.33           | 90.33       |
| 22    | 58.02                    | 67.48       | 70.23              | 81.30       | 92.00           | 88.00       |

ND: not determined.

**Table S6.** Raw data from the MRM analysis of the study on the abundance of HSP70 isoforms in relation to sperm capacitation → Excel file

**Table S7.** Raw data from the MRM analysis of the study on the abundance of HSP70 isoforms in relation to sperm motility → Excel file

**Table S8.** Comparison of total and progressive sperm motility between astheno-teratozoospermic, normozoospermic, and teratozoospermic samples

|                          | Astheno-teratozoosperm<br>N=3 | Normozoosperm<br>N=7 | Teratozoosperm<br>N=3 | F     | p-value |
|--------------------------|-------------------------------|----------------------|-----------------------|-------|---------|
| Total motility (%)       | 34.04 ± 5.86                  | 78.93 ± 12.50        | 68.53 ± 14.53         | 9.88  | 0.0043  |
| Progressive motility (%) | 21.16 ± 3.01                  | 60.47 ± 13.17        | 45.63 ± 7.40          | 14.37 | 0.0011  |

Data are shown as mean ± SD. Data were compared using one-way ANOVA.

**Table S9.** Tukey's multiple comparisons of total and sperm progressive motility between astheno-teratozoospermic, normozoospermic, and teratozoospermic samples

|                      | Mean<br>difference | 95% confidence interval<br>of difference | p-value |
|----------------------|--------------------|------------------------------------------|---------|
| Total motility       |                    |                                          |         |
| A vs N               | -0.4953            | -0.8009 to -0.1897                       | 0.0032  |
| A vs T               | -0.3619            | -0.7235 to -0.0003270                    | 0.0498  |
| N vs T               | 0.1334             | -0.1722 to 0.4390                        | 0.4816  |
| Progressive motility |                    |                                          |         |
| A vs N               | -0.4173            | -0.6312 to -0.2034                       | 0.0009  |
| A vs T               | -0.264             | -0.5171 to -0.01097                      | 0.0412  |
| N vs T               | 0.1532             | -0.06064 to 0.3671                       | 0.1716  |

A: astheno-teratozoospermic samples, N: normozoospermic samples, T: teratozoospermic samples.

[illegible]

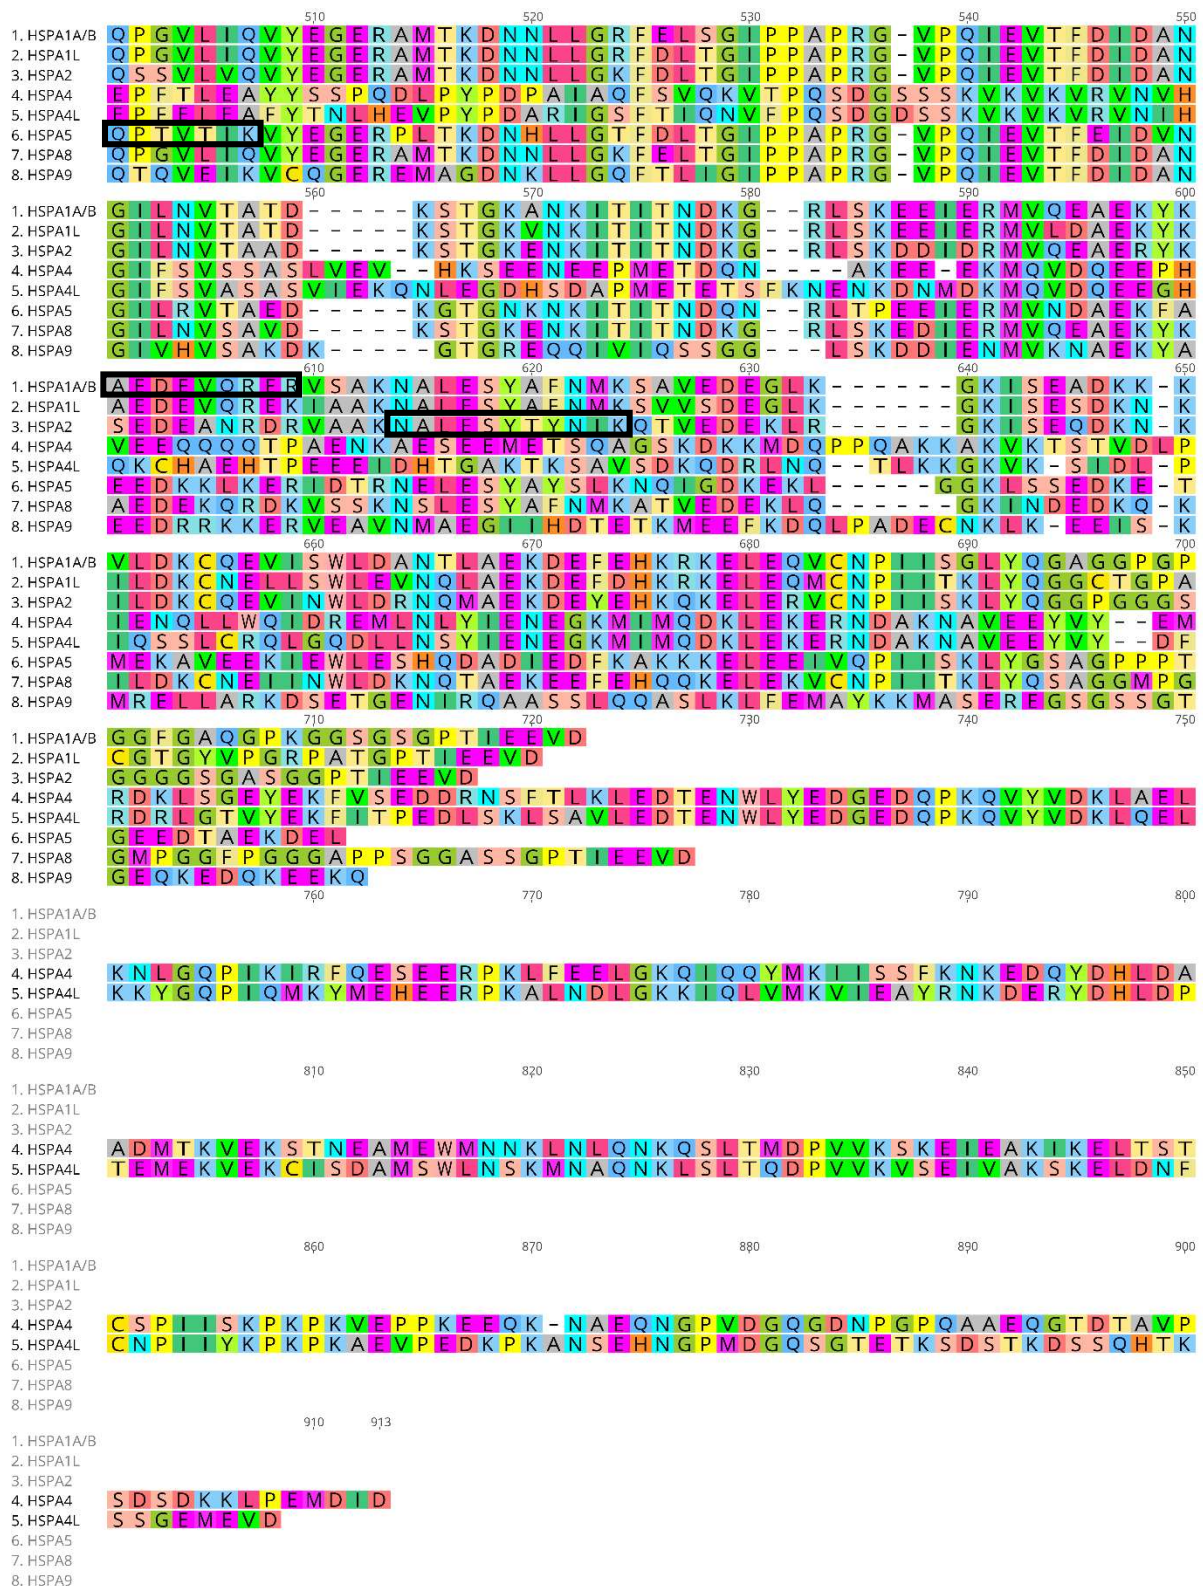

**Figure S1.** Alignment of the HSP70 isoforms investigated in MRM. Tryptic peptides specific from each isoform are highlighted in black rectangles.

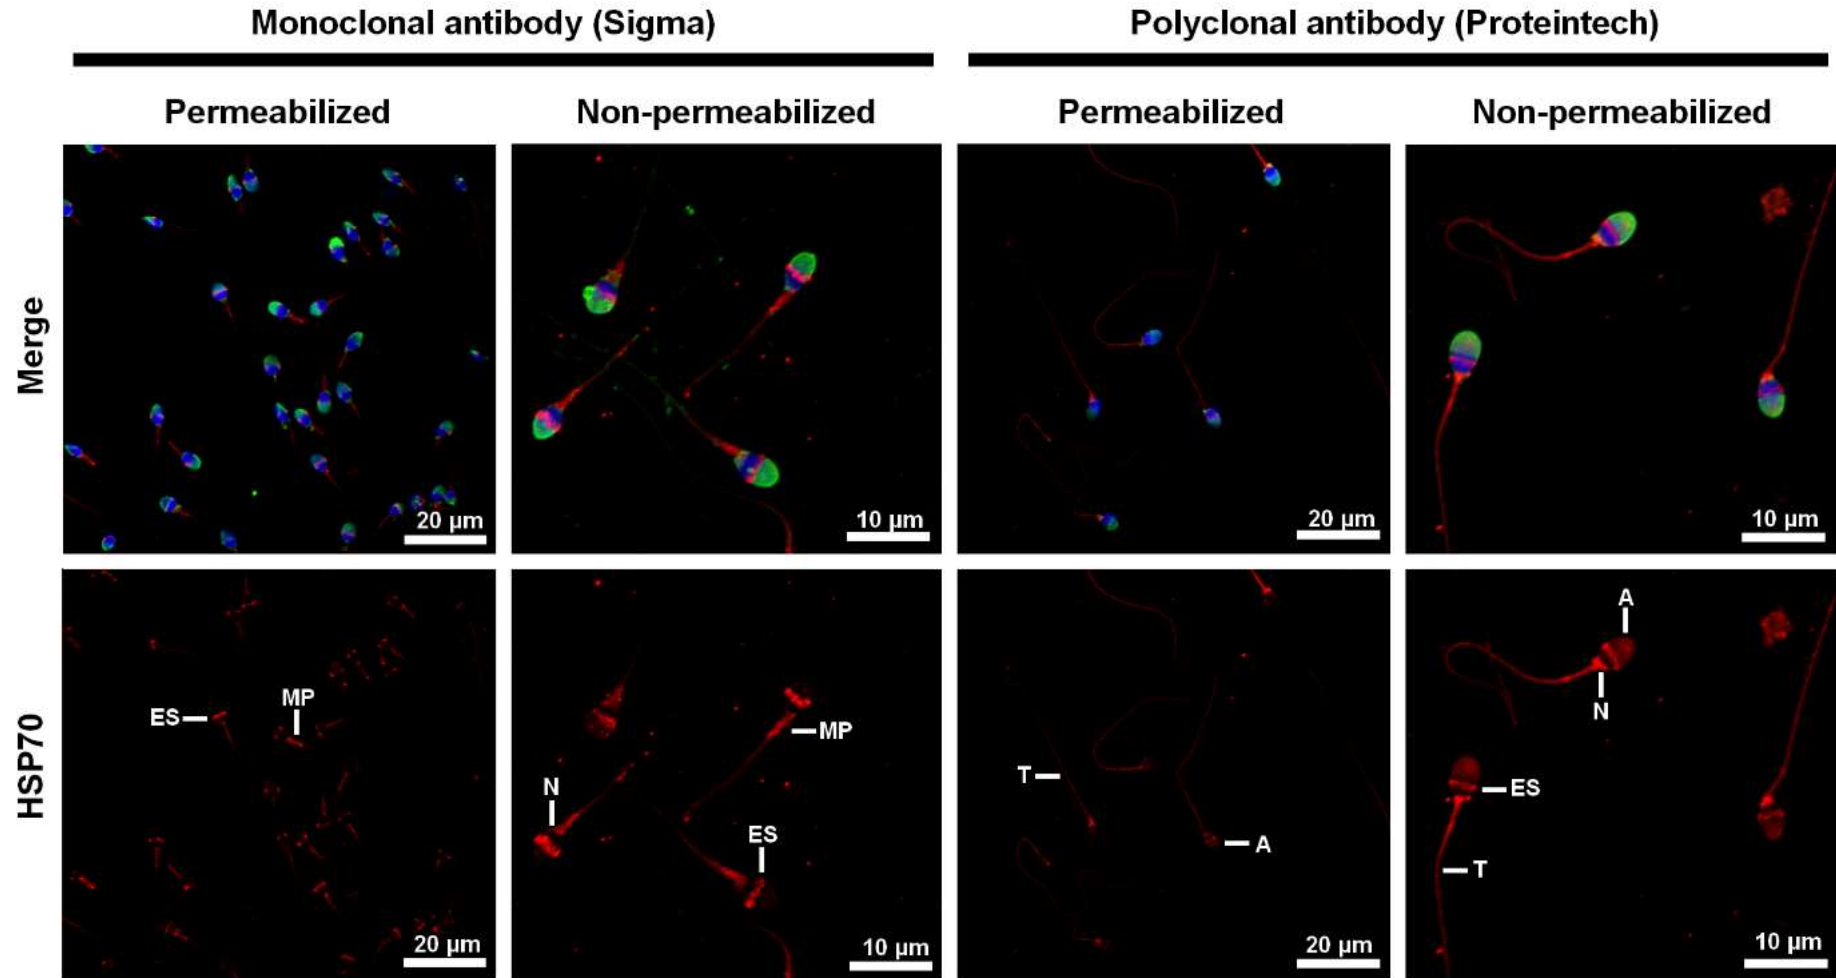

**Figure S2.** Localization of HSP70 in permeabilized and non-permeabilized human spermatozoa. Non-capacitated human spermatozoa were fixed with 4% paraformaldehyde, permeabilized or not with 0.3% Triton-X-100, and stained with monoclonal (Sigma, H5147) or polyclonal (Proteintech, 10995-1-AP) anti-HSP70 antibodies. Red: Hsp70, Blue: DAPI staining of the nucleus, Green: PSA-FITC staining of the acrosome. Images of the non-permeabilized conditions are maximum intensity projections (MaxIP) obtained from z stack images using Nikon NIS Elements software. Representative results of N=4 experiments. A: acrosome, ES: equatorial segment, MP: mid-piece, N: neck, T: tail.
