# Supplementary material for: Targeted Analysis of HSP70 Isoforms in Human Spermatozoa in the Context of Capacitation and Motility
Source: Int J Mol Sci. 2022 Jun 10;23(12):6497. doi: 10.3390/ijms23126497 (PMC9224233; doi:10.3390/ijms23126497)
Supplement: Supplementary file 1 [file ijms-23-06497-s001.zip]

Archive with 5 entries (5 files):
- Supplementary Information.pdf
- Table S3.xlsx
- Table S4.xlsx
- Table S6.xlsx
- Table S7.xlsx
