# Supplementary material for: Targeted Analysis of HSP70 Isoforms in Human Spermatozoa in the Context of Capacitation and Motility
Source: Int J Mol Sci. 2022 Jun 10;23(12):6497. doi: 10.3390/ijms23126497 (PMC9224233; doi:10.3390/ijms23126497)
Supplement: Supplementary file 1 [file ijms-23-06497-s001.zip › Table S3.xlsx]

## Sheet: Table S3
Table S3. Transition list for the MRM analysis for the study on the abundance of HSP70 isoforms in relation to sperm capacitation
Parent ion	Fragment ion	Retention time	Accession number	Peptide	Fragment	Collision energy
829.928	1133.56	18.54	sp|P0DMV8|HS71A_HUMAN	NQVALNPQNTVFDAK	y10	48.9
829.928	1019.52	18.54	sp|P0DMV8|HS71A_HUMAN	NQVALNPQNTVFDAK	y9	48.9
829.928	243.109	18.54	sp|P0DMV8|HS71A_HUMAN	NQVALNPQNTVFDAK	b2	48.9
829.928	342.177	18.54	sp|P0DMV8|HS71A_HUMAN	NQVALNPQNTVFDAK	b3	48.9
829.928	413.214	18.54	sp|P0DMV8|HS71A_HUMAN	NQVALNPQNTVFDAK	b4	48.9
829.928	526.298	18.54	sp|P0DMV8|HS71A_HUMAN	NQVALNPQNTVFDAK	b5	48.9
611.792	1075.51	16.91	sp|P0DMV8|HS71A_HUMAN	FGDPVVQSDMK	y10	35.2
611.792	903.46	16.91	sp|P0DMV8|HS71A_HUMAN	FGDPVVQSDMK	y8	35.2
611.792	707.339	16.91	sp|P0DMV8|HS71A_HUMAN	FGDPVVQSDMK	y6	35.2
611.792	608.271	16.91	sp|P0DMV8|HS71A_HUMAN	FGDPVVQSDMK	y5	35.2
611.792	452.234	16.91	sp|P0DMV8|HS71A_HUMAN	FGDPVVQSDMK	y8	35.2
611.792	320.124	16.91	sp|P0DMV8|HS71A_HUMAN	FGDPVVQSDMK	b3	35.2
531.247	932.443	22.22	sp|P0DMV8|HS71A_HUMAN	EDEVQ[Dea]RER	y7	30.2
531.247	817.416	22.22	sp|P0DMV8|HS71A_HUMAN	EDEVQ[Dea]RER	y6	30.2
531.247	589.305	22.22	sp|P0DMV8|HS71A_HUMAN	EDEVQ[Dea]RER	y4	30.2
531.247	409.212	22.22	sp|P0DMV8|HS71A_HUMAN	EDEVQ[Dea]RER	y6	30.2
531.247	245.077	22.22	sp|P0DMV8|HS71A_HUMAN	EDEVQ[Dea]RER	b2	30.2
531.247	473.188	22.22	sp|P0DMV8|HS71A_HUMAN	EDEVQ[Dea]RER	b4	30.2
808.897	1122.57	25.81	sp|P11142|HSP7C_HUMAN	SFYPEEVSSMVLTK	y10	47.6
808.897	993.529	25.81	sp|P11142|HSP7C_HUMAN	SFYPEEVSSMVLTK	y9	47.6
808.897	765.418	25.81	sp|P11142|HSP7C_HUMAN	SFYPEEVSSMVLTK	y7	47.6
808.897	691.847	25.81	sp|P11142|HSP7C_HUMAN	SFYPEEVSSMVLTK	y12	47.6
808.897	610.316	25.81	sp|P11142|HSP7C_HUMAN	SFYPEEVSSMVLTK	y11	47.6
808.897	235.108	25.81	sp|P11142|HSP7C_HUMAN	SFYPEEVSSMVLTK	b2	47.6
741.407	1016.57	20.32	sp|P11142|HSP7C_HUMAN	SQIHDIVLVGGSTR	y10	43.3
741.407	788.462	20.32	sp|P11142|HSP7C_HUMAN	SQIHDIVLVGGSTR	y8	43.3
741.407	689.394	20.32	sp|P11142|HSP7C_HUMAN	SQIHDIVLVGGSTR	y7	43.3
741.407	577.32	20.32	sp|P11142|HSP7C_HUMAN	SQIHDIVLVGGSTR	y11	43.3
741.407	216.098	20.32	sp|P11142|HSP7C_HUMAN	SQIHDIVLVGGSTR	b2	43.3
741.407	581.268	20.32	sp|P11142|HSP7C_HUMAN	SQIHDIVLVGGSTR	b5	43.3
614.639	929.469	19.08	sp|Q99798|ACON_HUMAN	IVYGHLDDPASQEIER	y8	36.4
614.639	761.379	19.08	sp|Q99798|ACON_HUMAN	IVYGHLDDPASQEIER	y6	36.4
614.639	674.347	19.08	sp|Q99798|ACON_HUMAN	IVYGHLDDPASQEIER	y5	36.4
614.639	546.288	19.08	sp|Q99798|ACON_HUMAN	IVYGHLDDPASQEIER	y4	36.4
614.639	815.379	19.08	sp|Q99798|ACON_HUMAN	IVYGHLDDPASQEIER	y14	36.4
614.639	913.441	19.08	sp|Q99798|ACON_HUMAN	IVYGHLDDPASQEIER	b8	36.4
632.806	907.452	21.96	sp|Q99798|ACON_HUMAN	EDIANLADEFK	y8	36.6
632.806	836.415	21.96	sp|Q99798|ACON_HUMAN	EDIANLADEFK	y7	36.6
632.806	722.372	21.96	sp|Q99798|ACON_HUMAN	EDIANLADEFK	y6	36.6
632.806	609.288	21.96	sp|Q99798|ACON_HUMAN	EDIANLADEFK	y5	36.6
632.806	538.251	21.96	sp|Q99798|ACON_HUMAN	EDIANLADEFK	y4	36.6
632.806	245.077	21.96	sp|Q99798|ACON_HUMAN	EDIANLADEFK	b2	36.6
732.378	1101.59	18.18	sp|Q99798|ACON_HUMAN	SQFTITPGSEQIR	y10	42.8
732.378	1000.54	18.18	sp|Q99798|ACON_HUMAN	SQFTITPGSEQIR	y9	42.8
732.378	887.458	18.18	sp|Q99798|ACON_HUMAN	SQFTITPGSEQIR	y8	42.8
732.378	786.41	18.18	sp|Q99798|ACON_HUMAN	SQFTITPGSEQIR	y7	42.8
732.378	216.098	18.18	sp|Q99798|ACON_HUMAN	SQFTITPGSEQIR	b2	42.8
732.378	678.346	18.18	sp|Q99798|ACON_HUMAN	SQFTITPGSEQIR	b6	42.8
801.4	1088.54	18.23	sp|Q99798|ACON_HUMAN	NAVTQEFGPVPDTAR	y10	47.1
801.4	959.495	18.23	sp|Q99798|ACON_HUMAN	NAVTQEFGPVPDTAR	y9	47.1
801.4	812.426	18.23	sp|Q99798|ACON_HUMAN	NAVTQEFGPVPDTAR	y8	47.1
801.4	755.405	18.23	sp|Q99798|ACON_HUMAN	NAVTQEFGPVPDTAR	y7	47.1
801.4	559.283	18.23	sp|Q99798|ACON_HUMAN	NAVTQEFGPVPDTAR	y5	47.1
801.4	285.156	18.23	sp|Q99798|ACON_HUMAN	NAVTQEFGPVPDTAR	b3	47.1
632.306	1002.49	17.41	sp|P34931|HS71L_HUMAN	FNDPVVQADMK	y9	36.5
632.306	887.466	17.41	sp|P34931|HS71L_HUMAN	FNDPVVQADMK	y8	36.5
632.306	691.344	17.41	sp|P34931|HS71L_HUMAN	FNDPVVQADMK	y6	36.5
632.306	592.276	17.41	sp|P34931|HS71L_HUMAN	FNDPVVQADMK	y5	36.5
632.306	377.146	17.41	sp|P34931|HS71L_HUMAN	FNDPVVQADMK	b3	36.5
650.306	1023.49	25.96	sp|P34931|HS71L_HUMAN	FEELC[CAM]ADLFR	y8	37.6
650.306	894.45	25.96	sp|P34931|HS71L_HUMAN	FEELC[CAM]ADLFR	y7	37.6
650.306	781.366	25.96	sp|P34931|HS71L_HUMAN	FEELC[CAM]ADLFR	y6	37.6
650.306	621.335	25.96	sp|P34931|HS71L_HUMAN	FEELC[CAM]ADLFR	y5	37.6
650.306	277.118	25.96	sp|P34931|HS71L_HUMAN	FEELC[CAM]ADLFR	b2	37.6
650.306	406.161	25.96	sp|P34931|HS71L_HUMAN	FEELC[CAM]ADLFR	b3	37.6
563.288	899.401	20.48	sp|P34931|HS71L_HUMAN	LLQDYFNGR	y7	32.2
563.288	771.342	20.48	sp|P34931|HS71L_HUMAN	LLQDYFNGR	y6	32.2
563.288	656.315	20.48	sp|P34931|HS71L_HUMAN	LLQDYFNGR	y5	32.2
563.288	493.252	20.48	sp|P34931|HS71L_HUMAN	LLQDYFNGR	y4	32.2
563.288	450.204	20.48	sp|P34931|HS71L_HUMAN	LLQDYFNGR	y7	32.2
563.288	227.175	20.48	sp|P34931|HS71L_HUMAN	LLQDYFNGR	b2	32.2
748.355	1197.54	18.63	sp|P34932|HSP74_HUMAN	AGGIETIANEYSDR	y10	43.8
748.355	1068.5	18.63	sp|P34932|HSP74_HUMAN	AGGIETIANEYSDR	y9	43.8
748.355	967.448	18.63	sp|P34932|HSP74_HUMAN	AGGIETIANEYSDR	y8	43.8
748.355	854.364	18.63	sp|P34932|HSP74_HUMAN	AGGIETIANEYSDR	y7	43.8
748.355	783.327	18.63	sp|P34932|HSP74_HUMAN	AGGIETIANEYSDR	y6	43.8
748.355	540.241	18.63	sp|P34932|HSP74_HUMAN	AGGIETIANEYSDR	y4	43.8
620.298	1021.48	21.45	sp|P34932|HSP74_HUMAN	AFSDPFVEAEK	y9	35.8
620.298	934.452	21.45	sp|P34932|HSP74_HUMAN	AFSDPFVEAEK	y8	35.8
620.298	819.425	21.45	sp|P34932|HSP74_HUMAN	AFSDPFVEAEK	y7	35.8
620.298	410.216	21.45	sp|P34932|HSP74_HUMAN	AFSDPFVEAEK	y7	35.8
620.298	219.113	21.45	sp|P34932|HSP74_HUMAN	AFSDPFVEAEK	b2	35.8
620.298	306.145	21.45	sp|P34932|HSP74_HUMAN	AFSDPFVEAEK	b3	35.8
725.862	1151.57	18.74	sp|P38646|GRP75_HUMAN	TTPSVVAFTADGER	y11	42.4
725.862	965.469	18.74	sp|P38646|GRP75_HUMAN	TTPSVVAFTADGER	y9	42.4
725.862	866.4	18.74	sp|P38646|GRP75_HUMAN	TTPSVVAFTADGER	y8	42.4
725.862	795.363	18.74	sp|P38646|GRP75_HUMAN	TTPSVVAFTADGER	y7	42.4
725.862	648.295	18.74	sp|P38646|GRP75_HUMAN	TTPSVVAFTADGER	y6	42.4
725.862	624.815	18.74	sp|P38646|GRP75_HUMAN	TTPSVVAFTADGER	y12	42.4
685.992	862.478	12.48	sp|P38646|GRP75_HUMAN	STNGDTFLGGEDFDQALLR	y7	40.9
685.992	715.41	12.48	sp|P38646|GRP75_HUMAN	STNGDTFLGGEDFDQALLR	y6	40.9
685.992	600.383	12.48	sp|P38646|GRP75_HUMAN	STNGDTFLGGEDFDQALLR	y5	40.9
685.992	401.287	12.48	sp|P38646|GRP75_HUMAN	STNGDTFLGGEDFDQALLR	y3	40.9
685.992	934.445	12.48	sp|P38646|GRP75_HUMAN	STNGDTFLGGEDFDQALLR	y17	40.9
685.992	836.378	12.48	sp|P38646|GRP75_HUMAN	STNGDTFLGGEDFDQALLR	b8	40.9
756.352	1197.54	18.38	sp|O95757|HS74L_HUMAN	SGGIETIANEYSDR	y10	44.3
756.352	1068.5	18.38	sp|O95757|HS74L_HUMAN	SGGIETIANEYSDR	y9	44.3
756.352	967.448	18.38	sp|O95757|HS74L_HUMAN	SGGIETIANEYSDR	y8	44.3
756.352	854.364	18.38	sp|O95757|HS74L_HUMAN	SGGIETIANEYSDR	y7	44.3
756.352	783.327	18.38	sp|O95757|HS74L_HUMAN	SGGIETIANEYSDR	y6	44.3
756.352	540.241	18.38	sp|O95757|HS74L_HUMAN	SGGIETIANEYSDR	y4	44.3
653.817	1072.53	17.95	sp|O95757|HS74L_HUMAN	SFDDPIVQTER	y9	37.9
653.817	842.473	17.95	sp|O95757|HS74L_HUMAN	SFDDPIVQTER	y7	37.9
653.817	745.42	17.95	sp|O95757|HS74L_HUMAN	SFDDPIVQTER	y6	37.9
653.817	632.336	17.95	sp|O95757|HS74L_HUMAN	SFDDPIVQTER	y5	37.9
653.817	533.268	17.95	sp|O95757|HS74L_HUMAN	SFDDPIVQTER	y4	37.9
653.817	465.162	17.95	sp|O95757|HS74L_HUMAN	SFDDPIVQTER	b4	37.9
580.298	989.483	13.49	sp|O95757|HS74L_HUMAN	AVMEQANLQR	y8	33.3
580.298	858.443	13.49	sp|O95757|HS74L_HUMAN	AVMEQANLQR	y7	33.3
580.298	729.4	13.49	sp|O95757|HS74L_HUMAN	AVMEQANLQR	y6	33.3
580.298	601.342	13.49	sp|O95757|HS74L_HUMAN	AVMEQANLQR	y5	33.3
580.298	530.305	13.49	sp|O95757|HS74L_HUMAN	AVMEQANLQR	y4	33.3
580.298	495.245	13.49	sp|O95757|HS74L_HUMAN	AVMEQANLQR	y8	33.3
783.894	1005.5	20.36	sp|P11021|BIP_HUMAN	ITPSYVAFTPEGER	y9	46
783.894	906.432	20.36	sp|P11021|BIP_HUMAN	ITPSYVAFTPEGER	y8	46
783.894	835.394	20.36	sp|P11021|BIP_HUMAN	ITPSYVAFTPEGER	y7	46
783.894	688.326	20.36	sp|P11021|BIP_HUMAN	ITPSYVAFTPEGER	y6	46
783.894	587.278	20.36	sp|P11021|BIP_HUMAN	ITPSYVAFTPEGER	y5	46
783.894	676.828	20.36	sp|P11021|BIP_HUMAN	ITPSYVAFTPEGER	y12	46
715.849	1143.56	16.6	sp|P11021|BIP_HUMAN	TWNDPSVQQDIK	y10	41.7
715.849	1029.52	16.6	sp|P11021|BIP_HUMAN	TWNDPSVQQDIK	y9	41.7
715.849	914.494	16.6	sp|P11021|BIP_HUMAN	TWNDPSVQQDIK	y8	41.7
715.849	631.341	16.6	sp|P11021|BIP_HUMAN	TWNDPSVQQDIK	y5	41.7
715.849	288.134	16.6	sp|P11021|BIP_HUMAN	TWNDPSVQQDIK	b2	41.7
715.849	517.204	16.6	sp|P11021|BIP_HUMAN	TWNDPSVQQDIK	b4	41.7
730.883	1145.62	21.42	sp|P11021|BIP_HUMAN	SDIDEIVLVGGSTR	y11	42.7
730.883	788.462	21.42	sp|P11021|BIP_HUMAN	SDIDEIVLVGGSTR	y8	42.7
730.883	689.394	21.42	sp|P11021|BIP_HUMAN	SDIDEIVLVGGSTR	y7	42.7
730.883	576.31	21.42	sp|P11021|BIP_HUMAN	SDIDEIVLVGGSTR	y6	42.7
730.883	477.242	21.42	sp|P11021|BIP_HUMAN	SDIDEIVLVGGSTR	y5	42.7
612.983	900.515	18.28	sp|P11021|BIP_HUMAN	SQIFSTASDNQPTVTIK	y8	36.3
612.983	658.413	18.28	sp|P11021|BIP_HUMAN	SQIFSTASDNQPTVTIK	y6	36.3
612.983	361.245	18.28	sp|P11021|BIP_HUMAN	SQIFSTASDNQPTVTIK	y3	36.3
612.983	216.098	18.28	sp|P11021|BIP_HUMAN	SQIFSTASDNQPTVTIK	b2	36.3
612.983	329.182	18.28	sp|P11021|BIP_HUMAN	SQIFSTASDNQPTVTIK	b3	36.3
612.983	476.25	18.28	sp|P11021|BIP_HUMAN	SQIFSTASDNQPTVTIK	b4	36.3
832.409	1120.56	19.99	sp|P54652|HSP72_HUMAN	NQVAMNPTNTIFDAK	y10	49
832.409	1006.52	19.99	sp|P54652|HSP72_HUMAN	NQVAMNPTNTIFDAK	y9	49
832.409	480.245	19.99	sp|P54652|HSP72_HUMAN	NQVAMNPTNTIFDAK	y4	49
832.409	243.109	19.99	sp|P54652|HSP72_HUMAN	NQVAMNPTNTIFDAK	b2	49
832.409	342.177	19.99	sp|P54652|HSP72_HUMAN	NQVAMNPTNTIFDAK	b3	49
832.409	413.214	19.99	sp|P54652|HSP72_HUMAN	NQVAMNPTNTIFDAK	b4	49
635.785	994.451	14.29	sp|P54652|HSP72_HUMAN	FEDATVQSDMK	y9	36.7
635.785	808.387	14.29	sp|P54652|HSP72_HUMAN	FEDATVQSDMK	y7	36.7
635.785	707.339	14.29	sp|P54652|HSP72_HUMAN	FEDATVQSDMK	y6	36.7
635.785	608.271	14.29	sp|P54652|HSP72_HUMAN	FEDATVQSDMK	y5	36.7
635.785	277.118	14.29	sp|P54652|HSP72_HUMAN	FEDATVQSDMK	b2	36.7
635.785	392.145	14.29	sp|P54652|HSP72_HUMAN	FEDATVQSDMK	b3	36.7
525.777	808.42	16.99	sp|P54652|HSP72_HUMAN	EIAEAYLGGK	y8	29.9
525.777	737.383	16.99	sp|P54652|HSP72_HUMAN	EIAEAYLGGK	y7	29.9
525.777	608.34	16.99	sp|P54652|HSP72_HUMAN	EIAEAYLGGK	y6	29.9
525.777	537.303	16.99	sp|P54652|HSP72_HUMAN	EIAEAYLGGK	y5	29.9
525.777	374.24	16.99	sp|P54652|HSP72_HUMAN	EIAEAYLGGK	y4	29.9
525.777	261.156	16.99	sp|P54652|HSP72_HUMAN	EIAEAYLGGK	y3	29.9
615.346	1043.62	20.89	sp|P54652|HSP72_HUMAN	DAGTITGLNVLR	y10	35.5
615.346	885.552	20.89	sp|P54652|HSP72_HUMAN	DAGTITGLNVLR	y8	35.5
615.346	772.468	20.89	sp|P54652|HSP72_HUMAN	DAGTITGLNVLR	y7	35.5
615.346	671.42	20.89	sp|P54652|HSP72_HUMAN	DAGTITGLNVLR	y6	35.5
615.346	501.314	20.89	sp|P54652|HSP72_HUMAN	DAGTITGLNVLR	y4	35.5
615.346	345.14	20.89	sp|P54652|HSP72_HUMAN	DAGTITGLNVLR	b4	35.5
658.33	1130.57	19.02	sp|P54652|HSP72_HUMAN	NALESYTYNIK	y9	38.1
658.33	1017.49	19.02	sp|P54652|HSP72_HUMAN	NALESYTYNIK	y8	38.1
658.33	888.446	19.02	sp|P54652|HSP72_HUMAN	NALESYTYNIK	y7	38.1
658.33	801.414	19.02	sp|P54652|HSP72_HUMAN	NALESYTYNIK	y6	38.1
658.33	638.351	19.02	sp|P54652|HSP72_HUMAN	NALESYTYNIK	y5	38.1
658.33	299.171	19.02	sp|P54652|HSP72_HUMAN	NALESYTYNIK	b3	38.1
