# Supplementary material for: Targeted Analysis of HSP70 Isoforms in Human Spermatozoa in the Context of Capacitation and Motility
Source: Int J Mol Sci. 2022 Jun 10;23(12):6497. doi: 10.3390/ijms23126497 (PMC9224233; doi:10.3390/ijms23126497)
Supplement: Supplementary file 1 [file ijms-23-06497-s001.zip › Table S4.xlsx]

## Sheet: Table S4
Table S4. Transition list for the MRM analysis for the study on the abundance of HSP70 isoforms in relation to sperm motility
Parent ion	Fragment ion	Retention time	Accession number	Peptide	Fragment	Collision energy
509.276772	888.503674	9.62	sp|Q9UIF3|TEKT2_HUMAN	EVEVIEATK	y8	28.8
509.276772	789.43526	9.62	sp|Q9UIF3|TEKT2_HUMAN	EVEVIEATK	y7	28.8
509.276772	660.392667	9.62	sp|Q9UIF3|TEKT2_HUMAN	EVEVIEATK	y6	28.8
509.276772	561.324253	9.62	sp|Q9UIF3|TEKT2_HUMAN	EVEVIEATK	y5	28.8
509.276772	448.240189	9.62	sp|Q9UIF3|TEKT2_HUMAN	EVEVIEATK	y4	28.8
509.276772	319.197596	9.62	sp|Q9UIF3|TEKT2_HUMAN	EVEVIEATK	y3	28.8
503.747324	875.446888	13.8	sp|Q9UIF3|TEKT2_HUMAN	METLEIDR	y7	28.5
503.747324	746.404294	13.8	sp|Q9UIF3|TEKT2_HUMAN	METLEIDR	y6	28.5
503.747324	645.356616	13.8	sp|Q9UIF3|TEKT2_HUMAN	METLEIDR	y5	28.5
503.747324	532.272552	13.8	sp|Q9UIF3|TEKT2_HUMAN	METLEIDR	y4	28.5
503.747324	403.229959	13.8	sp|Q9UIF3|TEKT2_HUMAN	METLEIDR	y3	28.5
503.747324	362.138032	13.8	sp|Q9UIF3|TEKT2_HUMAN	METLEIDR	b3	28.5
531.295496	859.488358	10.09	sp|Q9UIF3|TEKT2_HUMAN	TTNSTLSPLK	y8	30.2
531.295496	745.445431	10.09	sp|Q9UIF3|TEKT2_HUMAN	TTNSTLSPLK	y7	30.2
531.295496	658.413403	10.09	sp|Q9UIF3|TEKT2_HUMAN	TTNSTLSPLK	y6	30.2
531.295496	557.365724	10.09	sp|Q9UIF3|TEKT2_HUMAN	TTNSTLSPLK	y5	30.2
531.295496	444.28166	10.09	sp|Q9UIF3|TEKT2_HUMAN	TTNSTLSPLK	y4	30.2
531.295496	357.249632	10.09	sp|Q9UIF3|TEKT2_HUMAN	TTNSTLSPLK	y3	30.2
829.928468	1133.558563	17.8	sp|P0DMV8|HS71A_HUMAN	NQVALNPQNTVFDAK	y10	48.9
829.928468	1019.515636	17.8	sp|P0DMV8|HS71A_HUMAN	NQVALNPQNTVFDAK	y9	48.9
829.928468	243.108781	17.8	sp|P0DMV8|HS71A_HUMAN	NQVALNPQNTVFDAK	b2	48.9
829.928468	342.177195	17.8	sp|P0DMV8|HS71A_HUMAN	NQVALNPQNTVFDAK	b3	48.9
829.928468	413.214309	17.8	sp|P0DMV8|HS71A_HUMAN	NQVALNPQNTVFDAK	b4	48.9
829.928468	526.298373	17.8	sp|P0DMV8|HS71A_HUMAN	NQVALNPQNTVFDAK	b5	48.9
531.246534	932.4432	26.99	sp|P0DMV8|HS71A_HUMAN	EDEVQ[Dea]RER	y7	30.2
531.246534	817.416257	26.99	sp|P0DMV8|HS71A_HUMAN	EDEVQ[Dea]RER	y6	30.2
531.246534	589.305249	26.99	sp|P0DMV8|HS71A_HUMAN	EDEVQ[Dea]RER	y4	30.2
531.246534	409.211766	26.99	sp|P0DMV8|HS71A_HUMAN	EDEVQ[Dea]RER	y6	30.2
531.246534	245.076812	26.99	sp|P0DMV8|HS71A_HUMAN	EDEVQ[Dea]RER	b2	30.2
531.246534	473.187819	26.99	sp|P0DMV8|HS71A_HUMAN	EDEVQ[Dea]RER	b4	30.2
615.346051	1043.62077	21.74	sp|P54652|HSP72_HUMAN	DAGTITGLNVLR	y10	35.5
615.346051	885.551627	21.74	sp|P54652|HSP72_HUMAN	DAGTITGLNVLR	y8	35.5
615.346051	772.467563	21.74	sp|P54652|HSP72_HUMAN	DAGTITGLNVLR	y7	35.5
615.346051	671.419885	21.74	sp|P54652|HSP72_HUMAN	DAGTITGLNVLR	y6	35.5
615.346051	501.314357	21.74	sp|P54652|HSP72_HUMAN	DAGTITGLNVLR	y4	35.5
615.346051	345.140475	21.74	sp|P54652|HSP72_HUMAN	DAGTITGLNVLR	b4	35.5
658.330067	1130.572816	17.44	sp|P54652|HSP72_HUMAN	NALESYTYNIK	y9	38.1
658.330067	1017.488752	17.44	sp|P54652|HSP72_HUMAN	NALESYTYNIK	y8	38.1
658.330067	888.446159	17.44	sp|P54652|HSP72_HUMAN	NALESYTYNIK	y7	38.1
658.330067	801.414131	17.44	sp|P54652|HSP72_HUMAN	NALESYTYNIK	y6	38.1
658.330067	638.350802	17.44	sp|P54652|HSP72_HUMAN	NALESYTYNIK	y5	38.1
658.330067	299.171381	17.44	sp|P54652|HSP72_HUMAN	NALESYTYNIK	b3	38.1
808.897456	1122.571102	26.43	sp|P11142|HSP7C_HUMAN	SFYPEEVSSMVLTK	y10	47.6
808.897456	993.528509	26.43	sp|P11142|HSP7C_HUMAN	SFYPEEVSSMVLTK	y9	47.6
808.897456	765.417502	26.43	sp|P11142|HSP7C_HUMAN	SFYPEEVSSMVLTK	y7	47.6
808.897456	691.847235	26.43	sp|P11142|HSP7C_HUMAN	SFYPEEVSSMVLTK	y12	47.6
808.897456	610.315571	26.43	sp|P11142|HSP7C_HUMAN	SFYPEEVSSMVLTK	y11	47.6
808.897456	235.107718	26.43	sp|P11142|HSP7C_HUMAN	SFYPEEVSSMVLTK	b2	47.6
741.407172	1016.573485	15.1	sp|P11142|HSP7C_HUMAN	SQIHDIVLVGGSTR	y10	43.3
741.407172	788.462478	15.1	sp|P11142|HSP7C_HUMAN	SQIHDIVLVGGSTR	y8	43.3
741.407172	689.394064	15.1	sp|P11142|HSP7C_HUMAN	SQIHDIVLVGGSTR	y7	43.3
741.407172	577.319837	15.1	sp|P11142|HSP7C_HUMAN	SQIHDIVLVGGSTR	y11	43.3
741.407172	216.097882	15.1	sp|P11142|HSP7C_HUMAN	SQIHDIVLVGGSTR	b2	43.3
741.407172	581.267801	15.1	sp|P11142|HSP7C_HUMAN	SQIHDIVLVGGSTR	b5	43.3
650.305538	1023.492792	26.6	sp|P34931|HS71L_HUMAN	FEELC[CAM]ADLFR	y8	37.6
650.305538	894.450199	26.6	sp|P34931|HS71L_HUMAN	FEELC[CAM]ADLFR	y7	37.6
650.305538	781.366135	26.6	sp|P34931|HS71L_HUMAN	FEELC[CAM]ADLFR	y6	37.6
650.305538	621.335487	26.6	sp|P34931|HS71L_HUMAN	FEELC[CAM]ADLFR	y5	37.6
650.305538	277.118283	26.6	sp|P34931|HS71L_HUMAN	FEELC[CAM]ADLFR	b2	37.6
650.305538	406.160876	26.6	sp|P34931|HS71L_HUMAN	FEELC[CAM]ADLFR	b3	37.6
563.288005	899.400606	19.04	sp|P34931|HS71L_HUMAN	LLQDYFNGR	y7	32.2
563.288005	771.342029	19.04	sp|P34931|HS71L_HUMAN	LLQDYFNGR	y6	32.2
563.288005	656.315085	19.04	sp|P34931|HS71L_HUMAN	LLQDYFNGR	y5	32.2
563.288005	493.251757	19.04	sp|P34931|HS71L_HUMAN	LLQDYFNGR	y4	32.2
563.288005	450.203941	19.04	sp|P34931|HS71L_HUMAN	LLQDYFNGR	y7	32.2
563.288005	227.175404	19.04	sp|P34931|HS71L_HUMAN	LLQDYFNGR	b2	32.2
748.354802	1197.538222	17.34	sp|P34932|HSP74_HUMAN	AGGIETIANEYSDR	y10	43.8
748.354802	1068.495629	17.34	sp|P34932|HSP74_HUMAN	AGGIETIANEYSDR	y9	43.8
748.354802	967.44795	17.34	sp|P34932|HSP74_HUMAN	AGGIETIANEYSDR	y8	43.8
748.354802	854.363886	17.34	sp|P34932|HSP74_HUMAN	AGGIETIANEYSDR	y7	43.8
748.354802	783.326772	17.34	sp|P34932|HSP74_HUMAN	AGGIETIANEYSDR	y6	43.8
748.354802	540.241252	17.34	sp|P34932|HSP74_HUMAN	AGGIETIANEYSDR	y4	43.8
620.298235	1021.483667	21.05	sp|P34932|HSP74_HUMAN	AFSDPFVEAEK	y9	35.8
620.298235	934.451639	21.05	sp|P34932|HSP74_HUMAN	AFSDPFVEAEK	y8	35.8
620.298235	819.424696	21.05	sp|P34932|HSP74_HUMAN	AFSDPFVEAEK	y7	35.8
620.298235	410.215986	21.05	sp|P34932|HSP74_HUMAN	AFSDPFVEAEK	y7	35.8
620.298235	219.112804	21.05	sp|P34932|HSP74_HUMAN	AFSDPFVEAEK	b2	35.8
620.298235	306.144832	21.05	sp|P34932|HSP74_HUMAN	AFSDPFVEAEK	b3	35.8
725.862262	1151.569128	17.31	sp|P38646|GRP75_HUMAN	TTPSVVAFTADGER	y11	42.4
725.862262	965.468686	17.31	sp|P38646|GRP75_HUMAN	TTPSVVAFTADGER	y9	42.4
725.862262	866.400272	17.31	sp|P38646|GRP75_HUMAN	TTPSVVAFTADGER	y8	42.4
725.862262	795.363158	17.31	sp|P38646|GRP75_HUMAN	TTPSVVAFTADGER	y7	42.4
725.862262	648.294744	17.31	sp|P38646|GRP75_HUMAN	TTPSVVAFTADGER	y6	42.4
725.862262	624.814584	17.31	sp|P38646|GRP75_HUMAN	TTPSVVAFTADGER	y12	42.4
681.374809	1162.64665	29.31	sp|P38646|GRP75_HUMAN	AQFEGIVTDLIR	y10	39.6
681.374809	1015.578236	29.31	sp|P38646|GRP75_HUMAN	AQFEGIVTDLIR	y9	39.6
681.374809	886.535643	29.31	sp|P38646|GRP75_HUMAN	AQFEGIVTDLIR	y8	39.6
681.374809	716.430115	29.31	sp|P38646|GRP75_HUMAN	AQFEGIVTDLIR	y6	39.6
681.374809	617.361701	29.31	sp|P38646|GRP75_HUMAN	AQFEGIVTDLIR	y5	39.6
681.374809	200.102967	29.31	sp|P38646|GRP75_HUMAN	AQFEGIVTDLIR	b2	39.6
756.352259	1197.538222	16.98	sp|O95757|HS74L_HUMAN	SGGIETIANEYSDR	y10	44.3
756.352259	1068.495629	16.98	sp|O95757|HS74L_HUMAN	SGGIETIANEYSDR	y9	44.3
756.352259	967.44795	16.98	sp|O95757|HS74L_HUMAN	SGGIETIANEYSDR	y8	44.3
756.352259	854.363886	16.98	sp|O95757|HS74L_HUMAN	SGGIETIANEYSDR	y7	44.3
756.352259	783.326772	16.98	sp|O95757|HS74L_HUMAN	SGGIETIANEYSDR	y6	44.3
756.352259	540.241252	16.98	sp|O95757|HS74L_HUMAN	SGGIETIANEYSDR	y4	44.3
653.817324	1072.526929	15.63	sp|O95757|HS74L_HUMAN	SFDDPIVQTER	y9	37.9
653.817324	842.473043	15.63	sp|O95757|HS74L_HUMAN	SFDDPIVQTER	y7	37.9
653.817324	745.420279	15.63	sp|O95757|HS74L_HUMAN	SFDDPIVQTER	y6	37.9
653.817324	632.336215	15.63	sp|O95757|HS74L_HUMAN	SFDDPIVQTER	y5	37.9
653.817324	533.267801	15.63	sp|O95757|HS74L_HUMAN	SFDDPIVQTER	y4	37.9
653.817324	465.161605	15.63	sp|O95757|HS74L_HUMAN	SFDDPIVQTER	b4	37.9
783.893563	1005.499986	19.73	sp|P11021|BIP_HUMAN	ITPSYVAFTPEGER	y9	46
783.893563	906.431572	19.73	sp|P11021|BIP_HUMAN	ITPSYVAFTPEGER	y8	46
783.893563	835.394458	19.73	sp|P11021|BIP_HUMAN	ITPSYVAFTPEGER	y7	46
783.893563	688.326044	19.73	sp|P11021|BIP_HUMAN	ITPSYVAFTPEGER	y6	46
783.893563	587.278366	19.73	sp|P11021|BIP_HUMAN	ITPSYVAFTPEGER	y5	46
783.893563	676.827691	19.73	sp|P11021|BIP_HUMAN	ITPSYVAFTPEGER	y12	46
730.883195	1145.616078	22.34	sp|P11021|BIP_HUMAN	SDIDEIVLVGGSTR	y11	42.7
730.883195	788.462478	22.34	sp|P11021|BIP_HUMAN	SDIDEIVLVGGSTR	y8	42.7
730.883195	689.394064	22.34	sp|P11021|BIP_HUMAN	SDIDEIVLVGGSTR	y7	42.7
730.883195	576.31	22.34	sp|P11021|BIP_HUMAN	SDIDEIVLVGGSTR	y6	42.7
730.883195	477.241586	22.34	sp|P11021|BIP_HUMAN	SDIDEIVLVGGSTR	y5	42.7
612.982779	900.514908	17.24	sp|P11021|BIP_HUMAN	SQIFSTASDNQPTVTIK	y8	36.3
612.982779	658.413403	17.24	sp|P11021|BIP_HUMAN	SQIFSTASDNQPTVTIK	y6	36.3
612.982779	361.244546	17.24	sp|P11021|BIP_HUMAN	SQIFSTASDNQPTVTIK	y3	36.3
612.982779	216.097882	17.24	sp|P11021|BIP_HUMAN	SQIFSTASDNQPTVTIK	b2	36.3
612.982779	329.181946	17.24	sp|P11021|BIP_HUMAN	SQIFSTASDNQPTVTIK	b3	36.3
612.982779	476.25036	17.24	sp|P11021|BIP_HUMAN	SQIFSTASDNQPTVTIK	b4	36.3
