# Supplementary material for: Targeted Analysis of HSP70 Isoforms in Human Spermatozoa in the Context of Capacitation and Motility
Source: Int J Mol Sci. 2022 Jun 10;23(12):6497. doi: 10.3390/ijms23126497 (PMC9224233; doi:10.3390/ijms23126497)
Supplement: Supplementary file 1 [file ijms-23-06497-s001.zip › Table S6.xlsx]

## Sheet: ACON
		IVYGHLDDPASQEIER	EDIANLADEFK	SQFTITPGSEQIR	NAVTQEFGPVPDTAR
Donor	Sample	Peak Area	Peak Area	Peak Area	Peak Area
12	Capacitated	4817137	3465270.75	3642967.25	1922422
14	Capacitated	8603529	5472154	5981169.5	3083960.5
9	Capacitated	8962969	7740537	7322144.5	4045074.25
6	Capacitated	10258614	8766558	8145694	4795444
10	Capacitated	4137975	2695476	3348170.5	1621950.25
2	Capacitated	9703794	6775505.5	7169413.5	4051043.5
12	Non-capacitated	5386121	4113741.5	4147138.5	2272167.75
14	Non-capacitated	10729552	7300003.5	8791916	4626282
9	Non-capacitated	11393827	8400314	9558541	5367948
6	Non-capacitated	11759986	8715632	9628599	5294363.5
10	Non-capacitated	6764837.5	4934314.5	5090728.5	2864580.25
2	Non-capacitated	8618298	6935877	6913011	3859987.5

## Sheet: HSP1A
		NQVALNPQNTVFDAK	FGDPVVQSDMK	EDEVQ[+1]RER
Donor	Sample	Peak Area	Peak Area	Peak Area
12	Capacitated	2553664.5	2814817.5	29034090
14	Capacitated	2511675.5	2683407	39944584
9	Capacitated	2459215.5	3435953	39222260
6	Capacitated	3940621.25	5084249	48075868
10	Capacitated	1396244.25	1462353.125	28072112
2	Capacitated	1723561.75	2287564.5	68546584
12	Non-capacitated	2702126.25	2891866.5	28795214
14	Non-capacitated	3848059.25	3712299.75	52951484
9	Non-capacitated	3445584.75	4384099	55718588
6	Non-capacitated	3900251	4752672.5	46044948
10	Non-capacitated	2127244	2234835.25	44766340
2	Non-capacitated	1714006.375	2230593.75	65734088

## Sheet: HSP71L
		FNDPVVQADMK	FEELC[+57]ADLFR	LLQDYFNGR
Donor	Sample	Peak Area	Peak Area	Peak Area
12	Capacitated	2809678.5	2371262.5	12585714
14	Capacitated	3882384	859567.375	18793710
9	Capacitated	3822048	3239474	17168312
6	Capacitated	4179658.25	5552573.5	18625358
10	Capacitated	2799602.5	2846088.5	12538474
2	Capacitated	5619562.5	6693678	23367908
12	Non-capacitated	2652098	3098443	12579169
14	Non-capacitated	5246469	7496860	25199516
9	Non-capacitated	5397133	5592255.5	21913362
6	Non-capacitated	4560867	3101206	18843260
10	Non-capacitated	3984205	6577639	18670604
2	Non-capacitated	5183953.5	2515789	19906900

## Sheet: HSP72
		NQVAMNPTNTIFDAK	FEDATVQSDMK	EIAEAYLGGK	DAGTITGLNVLR	NALESYTYNIK
Donor	Sample	Peak Area	Peak Area	Peak Area	Peak Area	Peak Area
12	Capacitated	21374386	9873176	62352776	96470224	33173438
14	Capacitated	18621128	7214155	53486028	92980216	28133544
9	Capacitated	16905198	8119070	56162564	81817152	25333876
6	Capacitated	23681882	10997364	79134744	122825152	37902752
10	Capacitated	11551935	4276268.5	34021328	49843324	18660450
2	Capacitated	15391947	6725044	47945136	85638952	27771960
12	Non-capacitated	22151136	9832185	63278104	94964912	33675208
14	Non-capacitated	26232430	9258215	70035720	121293280	40533412
9	Non-capacitated	21608680	9136422	62521628	112909328	36404280
6	Non-capacitated	25481170	10858199	73291616	123633952	40697020
10	Non-capacitated	16452253	7085393	47281088	76264144	26860224
2	Non-capacitated	14578419	6240017.5	45812032	70933800	24129992

## Sheet: HSP74
		AGGIETIANEYSDR	AFSDPFVEAEK
Donor	Sample	Peak Area	Peak Area
12	Capacitated	544392	938092.1875
14	Capacitated	678876	1222916.375
9	Capacitated	923612.375	1400197.5
6	Capacitated	1286841.75	1986286.625
10	Capacitated	506879.40625	918890.5
2	Capacitated	1046308.125	1632916.5
12	Non-capacitated	619155.1875	1008866.5625
14	Non-capacitated	900332.3125	1534760.625
9	Non-capacitated	1206716.5	1850703.375
6	Non-capacitated	1258441.125	1801398
10	Non-capacitated	751248.5625	1281052.75
2	Non-capacitated	955833.25	1417669

## Sheet: HSP4L
		SGGIETIANEYSDR	SFDDPIVQTER	AVMEQANLQR
Donor	Sample	Peak Area	Peak Area	Peak Area
12	Capacitated	987413.875	1864537.875	1569013
14	Capacitated	751302.375	1494581.375	1059892.5
9	Capacitated	835505.8125	1078141.375	811962.25
6	Capacitated	1793346.75	2775634.75	1908579.25
10	Capacitated	370990.8125	704816.75	500482.1875
2	Capacitated	1326416.25	2820674.75	1699538.125
12	Non-capacitated	957375.0625	1976698	1632422.25
14	Non-capacitated	1096023	2043182	1306214.625
9	Non-capacitated	1081405.625	1794213.875	1065589.5
6	Non-capacitated	1766179.625	2876371	2130220.75
10	Non-capacitated	588147.875	1099937.25	703924.8125
2	Non-capacitated	1501605.75	2418099.5	1526408.375

## Sheet: HSPA5
		ITPSYVAFTPEGER	TWNDPSVQQDIK	SDIDEIVLVGGSTR	SQIFSTASDNQPTVTIK
Donor	Sample	Peak Area	Peak Area	Peak Area	Peak Area
12	Capacitated	4227817	3593043	2482211.25	2219742.5
14	Capacitated	5496753	3925895.5	2890217	3170037
9	Capacitated	7995176	7006586	4714133	4187084
6	Capacitated	18833278	16688411	9951676	9101913
10	Capacitated	4559098.5	3734429.75	2526933.5	2277349.75
2	Capacitated	11254866	10690978	5807454	5634743.5
12	Non-capacitated	3970014.25	3425473	2607490.75	2479791
14	Non-capacitated	7480492.5	5561998.5	3658111.5	3910354.5
9	Non-capacitated	10598628	9692847	5001150.5	5289357.5
6	Non-capacitated	19662092	18118204	10335686	9788051
10	Non-capacitated	6755413	5664175.5	3684583	3383666.25
2	Non-capacitated	9635766	9204498	4969298	4817864

## Sheet:  HSPA8
		SFYPEEVSSMVLTK	SQIHDIVLVGGSTR
Donor	Sample	Peak Area	Peak Area
12	Capacitated	575461.125	644671.625
14	Capacitated	1144280.25	926659.5
9	Capacitated	699307	1059263.375
6	Capacitated	905828.4375	1353956.25
10	Capacitated	733868.25	328735.53125
2	Capacitated	773195.5	732161.1875
12	Non-capacitated	593660.0625	749368.0625
14	Non-capacitated	1098519.125	1502413.25
9	Non-capacitated	946759.25	1563367.125
6	Non-capacitated	990595.375	1180087
10	Non-capacitated	731726.625	603441.6875
2	Non-capacitated	624358.625	676815.0625

## Sheet: HSPA9
		TTPSVVAFTADGER	STNGDTFLGGEDFDQALLR
Donor	Sample	Peak Area	Peak Area
12	Capacitated	1311732	569030.875
14	Capacitated	1777288.5	1213014.75
9	Capacitated	1419190.625	725805.75
6	Capacitated	2074111.5	693601.4375
10	Capacitated	805402	397848.03125
2	Capacitated	2748012.75	594320.5625
12	Non-capacitated	1143890.25	1389053.875
14	Non-capacitated	2424036.75	629841.75
9	Non-capacitated	1920692.125	988799.5625
6	Non-capacitated	2415324	829812.625
10	Non-capacitated	1321183.25	632533.625
2	Non-capacitated	2111175.5	599568.4375
