# Supplementary material for: Targeted Analysis of HSP70 Isoforms in Human Spermatozoa in the Context of Capacitation and Motility
Source: Int J Mol Sci. 2022 Jun 10;23(12):6497. doi: 10.3390/ijms23126497 (PMC9224233; doi:10.3390/ijms23126497)
Supplement: Supplementary file 1 [file ijms-23-06497-s001.zip › Table S7.xlsx]

## Sheet: TEKT2
	EVEVIEATK	METLEIDR	TTNSTLSPLK
Donor	Peak Area	Peak Area	Peak Area
1	3709446.5	1676235	3388700.25
10	2063042.375	581937.3125	2280702.5
11	2439166.75	1177956.875	2632415.75
12	2567978.75	1110239.875	2638544.25
13	2670318.25	1265359	3286628.75
14	2927369.5	1168232.75	3764528
15	1588054.75	873178.0625	1685733.875
16	3896671.25	2045734.375	3287848.75
17	2401020.25	1815950.25	2121070
18	1407454.375	673683.25	1473614.25
19	3140539.75	2011240.25	4170066
2	2997454.5	1113677.75	3909162
20	2968709.5	944086.375	4064105
3	1019504.375	433885.65625	881272
4	2050372	630178.6875	2033900
5	2405715.75	648716.625	2839581
6	2843927.75	1737170	3701889.5
7	2959458.25	1108134.625	3721409.75
8	2672202	1367177.875	4023171.5
9	2590029.25	536054.5	2775674.25

## Sheet: HS71A
	NQVALNPQNTVFDAK	EDEVQ[+1]RER
Donor	Peak Area	Peak Area
1	1153265.125	18819524
10	692590.875	15114731
11	906288.9375	16052835
12	1591196	16673929
13	2892397.5	16064656
14	1576046	18003036
15	760272.9375	12772873
16	1814621.625	26630744
17	1465113.75	17067864
18	883790	8322590.5
19	1657451	23612478
2	725165.25	27414370
20	1556543.125	16421125
3	517306.40625	5783108.5
4	1363692.75	15019897
5	1284186.875	12601711
6	1660473.5	17180238
7	1259001.5	20426044
8	1650166.5	24922718
9	1042427.1875	15705647

## Sheet: HS71L
	FEELC[+57]ADLFR	LLQDYFNGR
Donor	Peak Area	Peak Area
1	1143973.5	4931827.5
10	906151.0625	4275401.5
11	855786.25	3963008.25
12	935995.25	4877840
13	914176.3125	4855186
14	1133901.125	7202700
15	572679.5	2369404
16	1803869.875	9798921
17	664167.875	3509272.5
18	502719.90625	2360282.25
19	1019891.5	6025547
2	1384638.875	8028475.5
20	1118219.875	6373996.5
3	237953.5625	829183.1875
4	509564.3125	2245741.25
5	962047.5	5247030.5
6	1250467.375	7453278
7	843456.5	6861831.5
8	560687.0625	6220448
9	795717.625	4764013.5

## Sheet: HSP72
	DAGTITGLNVLR	NALESYTYNIK
Donor	Peak Area	Peak Area
1	14822576	2160933.5
10	10249053	1485658.875
11	12425787	1775224.375
12	20572368	2832165.75
13	14693395	2286567
14	16145350	2452924.5
15	9298682	1177978.875
16	21601850	2555823.25
17	13485234	1873807.375
18	8265887.5	1333707.25
19	18643228	2446691
2	12998284	2332026.5
20	22142022	2992592
3	3044608.25	358593.53125
4	9736970	1230305.625
5	17802912	2666121
6	20822264	3507969.75
7	14668200	2151384.25
8	16183284	2695713
9	10296722	1650223

## Sheet: HSP74
	AGGIETIANEYSDR	AFSDPFVEAEK
Donor	Peak Area	Peak Area
1	231960.953125	192404.25
10	157968.125	102688.3828125
11	192404.34375	119539.6640625
12	220849.875	114623.78125
13	361025.4375	226947.03125
14	202168.375	123743.6875
15	160317.109375	107691.59375
16	232950.796875	223690.875
17	234525.046875	134201.03125
18	99640.8671875	53453.421875
19	197269.3125	119358.5546875
2	242774.9375	170999.421875
20	186527.421875	121825.3046875
3	59507.7421875	24158.58984375
4	127829.59375	72770.3203125
5	233399.9375	182559.046875
6	333813.15625	244619.71875
7	122685.75	66186.1875
8	176645.15625	109795.3046875
9	188442.328125	108738.703125

## Sheet: HS74L
	SGGIETIANEYSDR	SFDDPIVQTER
Donor	Peak Area	Peak Area
1	277778.21875	372220
10	122483.984375	111197.578125
11	248794.71875	229133.859375
12	370523.53125	271765.5
13	309532.125	349515.09375
14	242380.28125	252217.921875
15	222014.359375	201268.59375
16	227838.625	292502.9375
17	314706.5	251101.53125
18	156201.3125	147024.53125
19	371348.125	361300.3125
2	293393.75	381424.375
20	290526.96875	350927.375
3	73065.0859375	59881.65234375
4	153130.546875	139362.203125
5	177787.484375	249483.984375
6	345287.5	464508.1875
7	178778.1875	186329.28125
8	209094.28125	234635.234375
9	162979.34375	147057.359375

## Sheet: HSPA5
	ITPSYVAFTPEGER	SDIDEIVLVGGSTR	SQIFSTASDNQPTVTIK
Donor	Peak Area	Peak Area	Peak Area
1	1824918.375	700666.625	394593.125
10	1385781	447028.75	210990.75
11	1289199.875	439269.71875	193762.609375
12	1715495	553740.875	152769.71875
13	4231110.5	1195278.125	625401.75
14	1857840.375	567083.25	216790.5625
15	1524413.625	514285.5	245106.609375
16	2739025.75	982984.4375	482342.5625
17	3320519	935964.9375	403761.6875
18	1092555.125	425833.84375	145602.15625
19	2143000.75	629073.9375	233907.015625
2	2461418	796430.6875	379008.53125
20	2347801.25	721628.75	396864.53125
3	1002085	401632.65625	131432.59375
4	1212184.25	371730.875	149844.875
5	1820534.25	564348.125	342441.78125
6	5123336.5	1481237.375	818975.8125
7	1277916.625	328951.59375	156592.96875
8	1935216	494911.4375	259911.125
9	1948093.125	663156.9375	235796.515625

## Sheet: HSPA8
	SFYPEEVSSMVLTK	SQIHDIVLVGGSTR
Donor	Peak Area	Peak Area
1	111936.6953125	121824.3203125
10	18710.328125	82510.0078125
11	34204.7109375	84189.5625
12	97635.796875	157966.375
13	376283.3125	397417.8125
14	94356.640625	211434.84375
15	28833.07421875	56483.6640625
16	84812.4453125	175367.078125
17	75301.4921875	138529.84375
18	29233.96484375	107144.2578125
19	46939.390625	158682.96875
2	31466.6796875	104583.28125
20	60830.97265625	162590.78125
3	45538.2109375	65815.2734375
4	32581.318359375	111239.125
5	64580.0859375	164551.84375
6	67271.6328125	183326.109375
7	35584.09765625	175833.53125
8	110574.6875	170926.15625
9	38985.3125	137216.96875

## Sheet: HSPA9
	TTPSVVAFTADGER	AQFEGIVTDLIR
Donor	Peak Area	Peak Area
1	135466.0625	217982.8125
10	83698.9296875	100238.046875
11	109946.703125	137910.15625
12	185319.671875	164199
13	186580.140625	230246
14	221635	222401.25
15	94310.921875	84655.078125
16	178055.6875	290452.5625
17	213687.9375	167509.453125
18	85591.3984375	64035.3046875
19	279103.28125	254886.65625
2	228941.765625	266628.375
20	200505	239541.0625
3	25959.0703125	45581.39453125
4	130593.0703125	115244.2421875
5	135311.546875	145347.328125
6	254361.546875	258211.890625
7	222480.984375	208301.515625
8	195137.65625	92545.375
9	142878.40625	128897.109375
